# Supplementary material
Source: publisher site journal article supplement (https://www.dovepress.com/get_supplementary_file.php?f=431009.docx)
Supplement: Supplementary file 1 [file get_supplementary_file.php]

**Figure S1** HPLC chromatogram of *Porphyra*-derived (**A**) polysaccharides (PP) and (**B**) oligosaccharides (PO). The molecular weights of fractions were ascertained by utilizing the calibration curve of standards consisting of polysaccharides and oligosaccharides with known molecular masses.

**Figure S2** Histopathological examination of vaginal tissues from mice intravaginally vaccinated with NEmO without a *C. albicans* challenge. The mice were intravaginally vaccinated once a week for 3 weeks. Seven days after the last vaccination, the mice were euthanized for the collection of vaginal tissues. A representative PAS-stained section of the vaginal tissue is shown. No obvious histopathological changes are observed.
